# Supplementary material
Source: publisher figshare collection journal article supplement (https://acs.figshare.com/ndownloader/files/4146148)
Supplement: Supplementary file 1 [file 4146148]

 
data_n0697 
  
_audit_creation_method            SHELXL-97 
_chemical_name_systematic 
; 
 ? 
; 
_chemical_name_common             ? 
_chemical_melting_point           ? 
_chemical_formula_moiety          ? 
_chemical_formula_sum 
 'C15 H10 Cl4 O3' 
_chemical_formula_weight          380.03 
  
loop_ 
 _atom_type_symbol 
 _atom_type_description 
 _atom_type_scat_dispersion_real 
 _atom_type_scat_dispersion_imag 
 _atom_type_scat_source 
 'C'  'C'   0.0033   0.0016 
 'International Tables Vol C Tables 4.2.6.8 and 6.1.1.4' 
 'H'  'H'   0.0000   0.0000 
 'International Tables Vol C Tables 4.2.6.8 and 6.1.1.4' 
 'O'  'O'   0.0106   0.0060 
 'International Tables Vol C Tables 4.2.6.8 and 6.1.1.4' 
 'Cl'  'Cl'   0.1484   0.1585 
 'International Tables Vol C Tables 4.2.6.8 and 6.1.1.4' 
  
_symmetry_cell_setting            Triclinic 
_symmetry_space_group_name_H-M    P-1 
  
loop_ 
 _symmetry_equiv_pos_as_xyz 
 'x, y, z' 
 '-x, -y, -z' 
  
_cell_length_a                    8.18970(10) 
_cell_length_b                    10.68760(10) 
_cell_length_c                    11.0632(2) 
_cell_angle_alpha                 72.7370(10) 
_cell_angle_beta                  88.7050(10) 
_cell_angle_gamma                 79.6570(10) 
_cell_volume                      909.21(2) 
_cell_formula_units_Z             2 
_cell_measurement_temperature     100(2) 
_cell_measurement_reflns_used     5513 
_cell_measurement_theta_min       2.35 
_cell_measurement_theta_max       29.97 
  
_exptl_crystal_description        plate 
_exptl_crystal_colour             yellow 
_exptl_crystal_size_max           0.30 
_exptl_crystal_size_mid           0.17 
_exptl_crystal_size_min           0.07 
_exptl_crystal_density_meas       ? 
_exptl_crystal_density_diffrn     1.388 
_exptl_crystal_density_method     'not measured' 
_exptl_crystal_F_000              384 
_exptl_absorpt_coefficient_mu     0.657 
_exptl_absorpt_correction_type    numerical 
_exptl_absorpt_correction_T_min   0.8558
_exptl_absorpt_correction_T_max   0.9620 
_exptl_absorpt_process_details    'face-indexed' 
  
_exptl_special_details 
; 
 ? 
; 
  
_diffrn_ambient_temperature       100(2) 
_diffrn_radiation_wavelength      0.71073 
_diffrn_radiation_type            MoK\a 
_diffrn_radiation_source          'fine-focus sealed tube' 
_diffrn_radiation_monochromator   graphite 
_diffrn_measurement_device_type   'Bruker APEX-II CCD' 
_diffrn_measurement_method        '\f and \w scans' 
_diffrn_detector_area_resol_mean  ? 
_diffrn_standards_number          0 
_diffrn_standards_interval_count  ? 
_diffrn_standards_interval_time   ? 
_diffrn_standards_decay_%         ?
_diffrn_reflns_number             14403 
_diffrn_reflns_av_R_equivalents   0.0658 
_diffrn_reflns_av_sigmaI/netI     0.0805 
_diffrn_reflns_limit_h_min        -11 
_diffrn_reflns_limit_h_max        11 
_diffrn_reflns_limit_k_min        -15 
_diffrn_reflns_limit_k_max        15 
_diffrn_reflns_limit_l_min        -15 
_diffrn_reflns_limit_l_max        15 
_diffrn_reflns_theta_min          1.93 
_diffrn_reflns_theta_max          30.02 
_reflns_number_total              5259 
_reflns_number_gt                 3527 
_reflns_threshold_expression      >2sigma(I) 
  
_computing_data_collection        'Bruker APEX2' 
_computing_cell_refinement        'Bruker SAINT' 
_computing_data_reduction         'Bruker SAINT' 
_computing_structure_solution     'SHELXS-97 (Sheldrick, 2008)' 
_computing_structure_refinement   'SHELXL-97 (Sheldrick, 2008)' 
_computing_molecular_graphics     'Bruker SHELXTL' 
_computing_publication_material   'Bruker SHELXTL' 
  
_refine_special_details 
; 
 Refinement of F^2^ against ALL reflections.  The weighted R-factor wR and 
 goodness of fit S are based on F^2^, conventional R-factors R are based 
 on F, with F set to zero for negative F^2^. The threshold expression of 
 F^2^ > 2sigma(F^2^) is used only for calculating R-factors(gt) etc. and is 
 not relevant to the choice of reflections for refinement.  R-factors based 
 on F^2^ are statistically about twice as large as those based on F, and R- 
 factors based on ALL data will be even larger. 

 Diffuse, disordered solvent molecules, a mixture of dichloromethane and 
 hexane, could not be adequately modeled.  The bypass procedure in Platon
 (Spek, 1990) was used to remove the electronic contribution from these
 solvents. The total potential solvent accessible void Volume was 196.2 Ang^3^
 and the electron count / cell =  63. As the exact solvent content is not 
 known, the reported formula reflects only the atoms used in the refinement.
; 
  
_refine_ls_structure_factor_coef  Fsqd 
_refine_ls_matrix_type            full 
_refine_ls_weighting_scheme       calc 
_refine_ls_weighting_details 
 'calc w=1/[\s^2^(Fo^2^)+(0.0324P)^2^+0.0000P] where P=(Fo^2^+2Fc^2^)/3' 
_atom_sites_solution_primary      direct 
_atom_sites_solution_secondary    difmap 
_atom_sites_solution_hydrogens    geom 
_refine_ls_hydrogen_treatment     constr
_refine_ls_extinction_method      none 
_refine_ls_extinction_coef        ? 
_refine_ls_number_reflns          5259 
_refine_ls_number_parameters      200 
_refine_ls_number_restraints      0 
_refine_ls_R_factor_all           0.0612 
_refine_ls_R_factor_gt            0.0393 
_refine_ls_wR_factor_ref          0.0856 
_refine_ls_wR_factor_gt           0.0810 
_refine_ls_goodness_of_fit_ref    0.886 
_refine_ls_restrained_S_all       0.886 
_refine_ls_shift/su_max           0.001 
_refine_ls_shift/su_mean          0.000 
  
loop_ 
 _atom_site_label 
 _atom_site_type_symbol 
 _atom_site_fract_x 
 _atom_site_fract_y 
 _atom_site_fract_z 
 _atom_site_U_iso_or_equiv 
 _atom_site_adp_type 
 _atom_site_occupancy 
 _atom_site_symmetry_multiplicity 
 _atom_site_calc_flag 
 _atom_site_refinement_flags 
 _atom_site_disorder_assembly 
 _atom_site_disorder_group 
Cl1 Cl 0.12675(6) 0.85163(5) 0.09972(4) 0.02544(12) Uani 1 1 d . . . 
Cl2 Cl -0.05298(6) 1.01550(5) 0.27538(5) 0.03068(13) Uani 1 1 d . . . 
Cl3 Cl 0.16924(6) 1.16882(5) 0.40069(5) 0.02867(13) Uani 1 1 d . . . 
Cl4 Cl 0.54828(6) 1.14407(5) 0.33859(5) 0.02469(12) Uani 1 1 d . . . 
O1 O 0.48735(18) 1.20395(14) 0.06285(13) 0.0303(3) Uani 1 1 d . . . 
O2 O 0.30065(17) 1.06439(13) -0.04581(12) 0.0263(3) Uani 1 1 d . . . 
O3 O 0.21519(17) 0.36500(13) 0.57594(14) 0.0314(3) Uani 1 1 d . . . 
C1 C 0.2488(2) 0.93354(18) 0.16890(17) 0.0193(4) Uani 1 1 d . . . 
C2 C 0.1548(2) 1.01107(18) 0.25270(17) 0.0212(4) Uani 1 1 d . . . 
C3 C 0.2459(2) 1.07461(18) 0.30425(17) 0.0206(4) Uani 1 1 d . . . 
C4 C 0.4284(2) 1.05921(18) 0.27010(18) 0.0200(4) Uani 1 1 d . . . 
C5 C 0.4227(2) 1.11459(18) 0.12646(18) 0.0209(4) Uani 1 1 d . . . 
C6 C 0.3177(2) 1.03986(18) 0.06690(18) 0.0209(4) Uani 1 1 d . . . 
C7 C 0.5027(2) 0.90821(17) 0.30772(18) 0.0189(4) Uani 1 1 d . . . 
H7A H 0.6189 0.8960 0.2805 0.023 Uiso 1 1 calc R . . 
H7B H 0.5035 0.8705 0.4010 0.023 Uiso 1 1 calc R . . 
C8 C 0.4020(2) 0.83248(17) 0.24659(17) 0.0185(4) Uani 1 1 d . . . 
H8 H 0.4751 0.8001 0.1844 0.022 Uiso 1 1 calc R . . 
C9 C 0.3495(2) 0.71195(17) 0.33859(17) 0.0185(4) Uani 1 1 d . . . 
C10 C 0.2653(2) 0.71661(18) 0.44802(17) 0.0206(4) Uani 1 1 d . . . 
H10 H 0.2398 0.7986 0.4676 0.025 Uiso 1 1 calc R . . 
C11 C 0.2172(2) 0.60269(18) 0.52998(18) 0.0223(4) Uani 1 1 d . . . 
H11 H 0.1593 0.6074 0.6043 0.027 Uiso 1 1 calc R . . 
C12 C 0.2545(2) 0.48338(18) 0.50190(19) 0.0236(4) Uani 1 1 d . . . 
C13 C 0.3376(2) 0.47679(19) 0.3933(2) 0.0258(4) Uani 1 1 d . . . 
H13 H 0.3635 0.3945 0.3744 0.031 Uiso 1 1 calc R . . 
C14 C 0.3834(2) 0.59034(18) 0.31188(19) 0.0232(4) Uani 1 1 d . . . 
H14 H 0.4387 0.5853 0.2366 0.028 Uiso 1 1 calc R . . 
C15 C 0.1377(3) 0.3641(2) 0.6924(2) 0.0343(5) Uani 1 1 d . . . 
H15A H 0.2081 0.3944 0.7443 0.051 Uiso 1 1 calc R . . 
H15B H 0.1220 0.2734 0.7377 0.051 Uiso 1 1 calc R . . 
H15C H 0.0296 0.4238 0.6754 0.051 Uiso 1 1 calc R . . 
  
loop_ 
 _atom_site_aniso_label 
 _atom_site_aniso_U_11 
 _atom_site_aniso_U_22 
 _atom_site_aniso_U_33 
 _atom_site_aniso_U_23 
 _atom_site_aniso_U_13 
 _atom_site_aniso_U_12 
Cl1 0.0235(2) 0.0272(2) 0.0235(2) -0.0022(2) -0.00330(19) -0.00754(19) 
Cl2 0.0148(2) 0.0387(3) 0.0358(3) -0.0081(2) 0.0060(2) -0.00361(19) 
Cl3 0.0252(2) 0.0299(3) 0.0309(3) -0.0130(2) 0.0096(2) 0.0005(2) 
Cl4 0.0222(2) 0.0258(2) 0.0285(3) -0.0112(2) 0.00386(19) -0.00582(18) 
O1 0.0342(8) 0.0282(8) 0.0270(8) -0.0029(6) 0.0077(6) -0.0118(6) 
O2 0.0250(7) 0.0299(8) 0.0190(7) -0.0005(6) 0.0015(6) -0.0036(6) 
O3 0.0275(8) 0.0195(7) 0.0403(9) 0.0012(6) 0.0065(7) -0.0045(6) 
C1 0.0175(9) 0.0199(9) 0.0193(9) -0.0035(8) 0.0003(7) -0.0043(7) 
C2 0.0136(8) 0.0222(10) 0.0210(9) 0.0021(8) 0.0038(7) -0.0004(7) 
C3 0.0195(9) 0.0177(9) 0.0198(9) -0.0023(7) 0.0058(7) 0.0023(7) 
C4 0.0173(9) 0.0194(9) 0.0227(10) -0.0051(8) 0.0034(7) -0.0037(7) 
C5 0.0178(9) 0.0195(9) 0.0221(10) -0.0037(8) 0.0040(7) 0.0005(7) 
C6 0.0166(9) 0.0200(9) 0.0210(10) -0.0005(8) 0.0027(7) 0.0004(7) 
C7 0.0161(8) 0.0178(9) 0.0202(9) -0.0027(7) 0.0003(7) -0.0012(7) 
C8 0.0157(8) 0.0178(9) 0.0198(9) -0.0042(7) 0.0016(7) 0.0004(7) 
C9 0.0142(8) 0.0187(9) 0.0175(9) -0.0002(7) -0.0013(7) 0.0013(7) 
C10 0.0200(9) 0.0176(9) 0.0207(9) -0.0017(8) -0.0008(7) -0.0015(7) 
C11 0.0205(9) 0.0224(10) 0.0196(9) -0.0006(8) 0.0009(7) -0.0025(7) 
C12 0.0179(9) 0.0180(9) 0.0277(10) 0.0033(8) -0.0027(8) -0.0016(7) 
C13 0.0217(10) 0.0187(10) 0.0354(11) -0.0068(9) 0.0006(8) -0.0016(8) 
C14 0.0182(9) 0.0225(10) 0.0280(10) -0.0075(8) 0.0023(8) -0.0015(7) 
C15 0.0308(11) 0.0274(11) 0.0346(12) 0.0063(9) 0.0050(9) -0.0063(9) 
  
_geom_special_details 
; 
 All esds (except the esd in the dihedral angle between two l.s. planes) 
 are estimated using the full covariance matrix.  The cell esds are taken 
 into account individually in the estimation of esds in distances, angles 
 and torsion angles; correlations between esds in cell parameters are only 
 used when they are defined by crystal symmetry.  An approximate (isotropic) 
 treatment of cell esds is used for estimating esds involving l.s. planes. 
; 
  
loop_ 
 _geom_bond_atom_site_label_1 
 _geom_bond_atom_site_label_2 
 _geom_bond_distance 
 _geom_bond_site_symmetry_2 
 _geom_bond_publ_flag 
Cl1 C1 1.760(2) . ? 
Cl2 C2 1.7087(18) . ? 
Cl3 C3 1.7107(19) . ? 
Cl4 C4 1.767(2) . ? 
O1 C5 1.206(2) . ? 
O2 C6 1.202(2) . ? 
O3 C12 1.376(2) . ? 
O3 C15 1.421(3) . ? 
C1 C6 1.524(2) . ? 
C1 C2 1.528(3) . ? 
C1 C8 1.578(2) . ? 
C2 C3 1.332(3) . ? 
C3 C4 1.526(3) . ? 
C4 C5 1.521(3) . ? 
C4 C7 1.552(2) . ? 
C5 C6 1.548(3) . ? 
C7 C8 1.543(3) . ? 
C7 H7A 0.9900 . ? 
C7 H7B 0.9900 . ? 
C8 C9 1.510(2) . ? 
C8 H8 1.0000 . ? 
C9 C10 1.389(3) . ? 
C9 C14 1.396(3) . ? 
C10 C11 1.400(2) . ? 
C10 H10 0.9500 . ? 
C11 C12 1.381(3) . ? 
C11 H11 0.9500 . ? 
C12 C13 1.381(3) . ? 
C13 C14 1.387(3) . ? 
C13 H13 0.9500 . ? 
C14 H14 0.9500 . ? 
C15 H15A 0.9800 . ? 
C15 H15B 0.9800 . ? 
C15 H15C 0.9800 . ? 
  
loop_ 
 _geom_angle_atom_site_label_1 
 _geom_angle_atom_site_label_2 
 _geom_angle_atom_site_label_3 
 _geom_angle 
 _geom_angle_site_symmetry_1 
 _geom_angle_site_symmetry_3 
 _geom_angle_publ_flag 
C12 O3 C15 117.71(16) . . ? 
C6 C1 C2 103.55(14) . . ? 
C6 C1 C8 107.22(14) . . ? 
C2 C1 C8 109.44(15) . . ? 
C6 C1 Cl1 110.44(13) . . ? 
C2 C1 Cl1 114.86(13) . . ? 
C8 C1 Cl1 110.85(12) . . ? 
C3 C2 C1 115.24(15) . . ? 
C3 C2 Cl2 123.45(14) . . ? 
C1 C2 Cl2 121.31(15) . . ? 
C2 C3 C4 114.94(16) . . ? 
C2 C3 Cl3 124.12(14) . . ? 
C4 C3 Cl3 120.94(15) . . ? 
C5 C4 C3 103.74(15) . . ? 
C5 C4 C7 108.66(15) . . ? 
C3 C4 C7 108.11(14) . . ? 
C5 C4 Cl4 110.64(13) . . ? 
C3 C4 Cl4 114.67(13) . . ? 
C7 C4 Cl4 110.67(13) . . ? 
O1 C5 C4 127.43(19) . . ? 
O1 C5 C6 122.11(17) . . ? 
C4 C5 C6 110.45(15) . . ? 
O2 C6 C1 127.07(19) . . ? 
O2 C6 C5 121.88(16) . . ? 
C1 C6 C5 111.03(15) . . ? 
C8 C7 C4 111.57(15) . . ? 
C8 C7 H7A 109.3 . . ? 
C4 C7 H7A 109.3 . . ? 
C8 C7 H7B 109.3 . . ? 
C4 C7 H7B 109.3 . . ? 
H7A C7 H7B 108.0 . . ? 
C9 C8 C7 114.41(15) . . ? 
C9 C8 C1 111.82(14) . . ? 
C7 C8 C1 108.90(14) . . ? 
C9 C8 H8 107.1 . . ? 
C7 C8 H8 107.1 . . ? 
C1 C8 H8 107.1 . . ? 
C10 C9 C14 117.96(17) . . ? 
C10 C9 C8 123.07(16) . . ? 
C14 C9 C8 118.95(16) . . ? 
C9 C10 C11 121.19(17) . . ? 
C9 C10 H10 119.4 . . ? 
C11 C10 H10 119.4 . . ? 
C12 C11 C10 119.50(17) . . ? 
C12 C11 H11 120.3 . . ? 
C10 C11 H11 120.3 . . ? 
O3 C12 C11 124.60(17) . . ? 
O3 C12 C13 115.20(17) . . ? 
C11 C12 C13 120.20(17) . . ? 
C12 C13 C14 119.99(18) . . ? 
C12 C13 H13 120.0 . . ? 
C14 C13 H13 120.0 . . ? 
C13 C14 C9 121.15(17) . . ? 
C13 C14 H14 119.4 . . ? 
C9 C14 H14 119.4 . . ? 
O3 C15 H15A 109.5 . . ? 
O3 C15 H15B 109.5 . . ? 
H15A C15 H15B 109.5 . . ? 
O3 C15 H15C 109.5 . . ? 
H15A C15 H15C 109.5 . . ? 
H15B C15 H15C 109.5 . . ? 
  
loop_ 
 _geom_torsion_atom_site_label_1 
 _geom_torsion_atom_site_label_2 
 _geom_torsion_atom_site_label_3 
 _geom_torsion_atom_site_label_4 
 _geom_torsion 
 _geom_torsion_site_symmetry_1 
 _geom_torsion_site_symmetry_2 
 _geom_torsion_site_symmetry_3 
 _geom_torsion_site_symmetry_4 
 _geom_torsion_publ_flag 
C6 C1 C2 C3 -58.8(2) . . . . ? 
C8 C1 C2 C3 55.3(2) . . . . ? 
Cl1 C1 C2 C3 -179.26(13) . . . . ? 
C6 C1 C2 Cl2 120.54(15) . . . . ? 
C8 C1 C2 Cl2 -125.38(15) . . . . ? 
Cl1 C1 C2 Cl2 0.05(19) . . . . ? 
C1 C2 C3 C4 0.2(2) . . . . ? 
Cl2 C2 C3 C4 -179.08(13) . . . . ? 
C1 C2 C3 Cl3 179.59(13) . . . . ? 
Cl2 C2 C3 Cl3 0.3(2) . . . . ? 
C2 C3 C4 C5 59.1(2) . . . . ? 
Cl3 C3 C4 C5 -120.30(15) . . . . ? 
C2 C3 C4 C7 -56.1(2) . . . . ? 
Cl3 C3 C4 C7 124.46(15) . . . . ? 
C2 C3 C4 Cl4 179.88(14) . . . . ? 
Cl3 C3 C4 Cl4 0.5(2) . . . . ? 
C3 C4 C5 O1 123.1(2) . . . . ? 
C7 C4 C5 O1 -122.0(2) . . . . ? 
Cl4 C4 C5 O1 -0.4(2) . . . . ? 
C3 C4 C5 C6 -56.61(18) . . . . ? 
C7 C4 C5 C6 58.25(18) . . . . ? 
Cl4 C4 C5 C6 179.94(11) . . . . ? 
C2 C1 C6 O2 -126.41(19) . . . . ? 
C8 C1 C6 O2 117.9(2) . . . . ? 
Cl1 C1 C6 O2 -3.0(2) . . . . ? 
C2 C1 C6 C5 55.49(18) . . . . ? 
C8 C1 C6 C5 -60.18(18) . . . . ? 
Cl1 C1 C6 C5 178.95(11) . . . . ? 
O1 C5 C6 O2 2.7(3) . . . . ? 
C4 C5 C6 O2 -177.61(16) . . . . ? 
O1 C5 C6 C1 -179.11(16) . . . . ? 
C4 C5 C6 C1 0.61(19) . . . . ? 
C5 C4 C7 C8 -57.11(19) . . . . ? 
C3 C4 C7 C8 54.87(19) . . . . ? 
Cl4 C4 C7 C8 -178.79(12) . . . . ? 
C4 C7 C8 C9 -128.39(15) . . . . ? 
C4 C7 C8 C1 -2.46(19) . . . . ? 
C6 C1 C8 C9 -171.94(15) . . . . ? 
C2 C1 C8 C9 76.38(19) . . . . ? 
Cl1 C1 C8 C9 -51.32(17) . . . . ? 
C6 C1 C8 C7 60.65(18) . . . . ? 
C2 C1 C8 C7 -51.03(18) . . . . ? 
Cl1 C1 C8 C7 -178.74(12) . . . . ? 
C7 C8 C9 C10 52.6(2) . . . . ? 
C1 C8 C9 C10 -71.8(2) . . . . ? 
C7 C8 C9 C14 -128.89(18) . . . . ? 
C1 C8 C9 C14 106.72(19) . . . . ? 
C14 C9 C10 C11 0.7(3) . . . . ? 
C8 C9 C10 C11 179.21(17) . . . . ? 
C9 C10 C11 C12 0.2(3) . . . . ? 
C15 O3 C12 C11 -3.1(3) . . . . ? 
C15 O3 C12 C13 176.62(18) . . . . ? 
C10 C11 C12 O3 179.25(18) . . . . ? 
C10 C11 C12 C13 -0.5(3) . . . . ? 
O3 C12 C13 C14 -179.95(18) . . . . ? 
C11 C12 C13 C14 -0.2(3) . . . . ? 
C12 C13 C14 C9 1.2(3) . . . . ? 
C10 C9 C14 C13 -1.4(3) . . . . ? 
C8 C9 C14 C13 -179.95(18) . . . . ? 
  
_diffrn_measured_fraction_theta_max    0.988 
_diffrn_reflns_theta_full              30.02 
_diffrn_measured_fraction_theta_full   0.988 
_refine_diff_density_max    0.513 
_refine_diff_density_min   -0.304 
_refine_diff_density_rms    0.073 

# SQUEEZE RESULTS (APPEND TO CIF)
# Note: Data are Listed for all Voids in the P1 Unit Cell
# i.e. Centre of Gravity, Solvent Accessible Volume,
# Recovered number of Electrons in the Void and
# Details about the Squeezed Material
loop_
  _platon_squeeze_void_nr
  _platon_squeeze_void_average_x
  _platon_squeeze_void_average_y
  _platon_squeeze_void_average_z
  _platon_squeeze_void_volume
  _platon_squeeze_void_count_electrons
  _platon_squeeze_void_content
   1 -0.034  0.500  0.000       195        63 ' '
_platon_squeeze_details
;
;
